# Supplementary material
Source: PubMed Central journal article supplement (PMC5540654)
Supplement: NIHMS871185-supplement-supplements.pdf [file NIHMS871185-supplement-supplements.pdf]

## SUPPLEMENTAL FIGURES

### Supplementary Figure 1

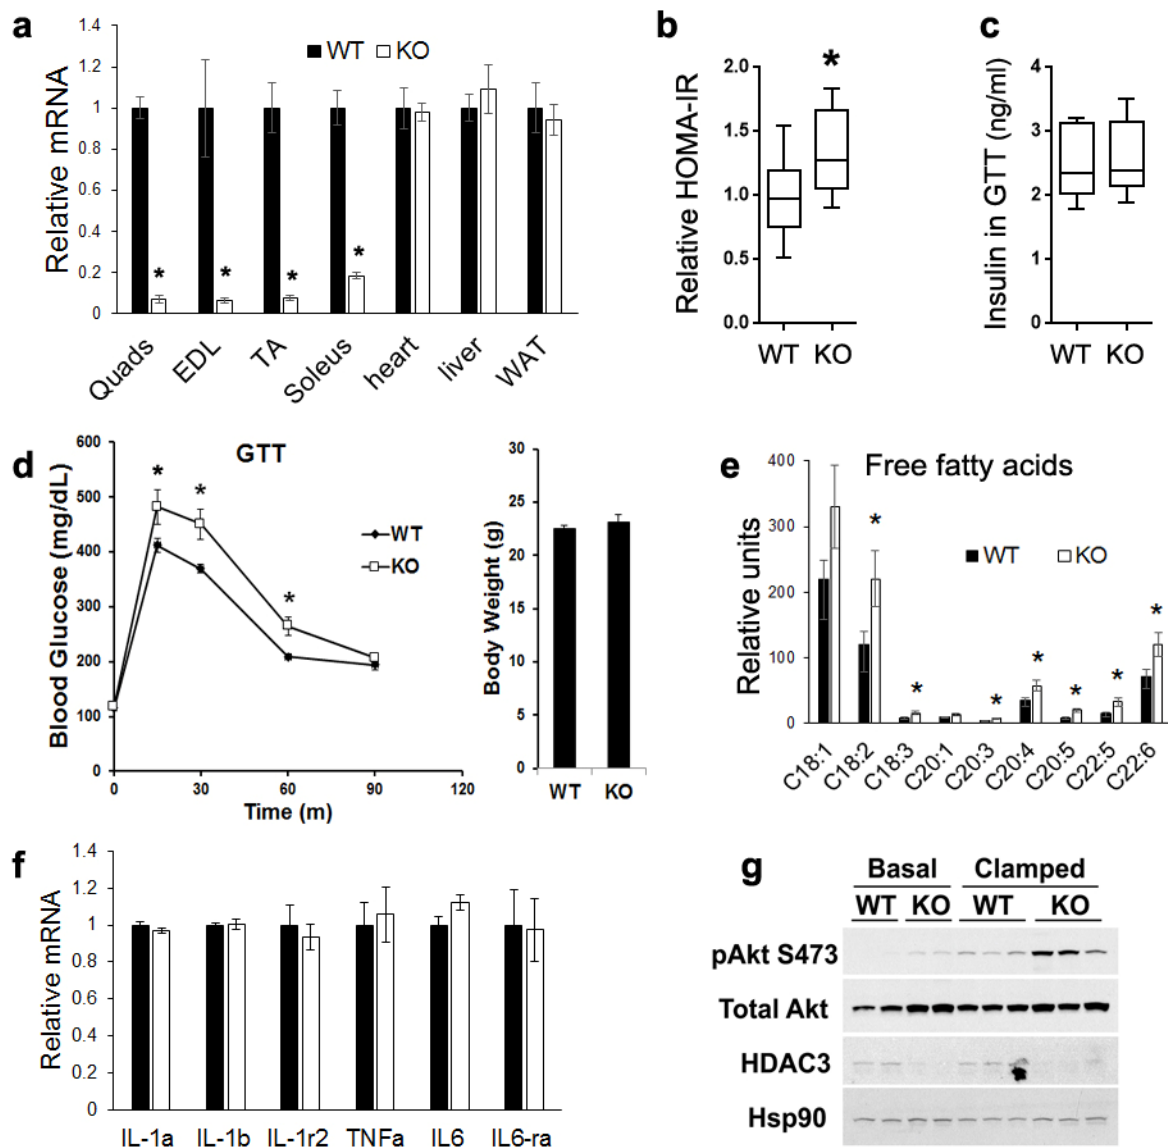

**Supplementary Figure 1. (a)** RT-qPCR analysis of HDAC3 at different tissues. Quads, quadriceps; EDL, extensor digitorum longus; TA, tibialis anterior; WAT, white adipose tissue.  $n = 5$ . **(b)** Relative homeostatic model assessment for insulin resistance (HOMA-IR). Values are basal glucose levels multiplied with basal insulin levels, followed by normalization to the average value of WT mice.  $n = 8$ . **(c)** Serum insulin levels taken at 30 min during glucose tolerance test (GTT),  $n = 8$ . **(d)** GTT on 8-weeks old mice on normal chow,  $n = 8$ . **(e)** Quantification of free fatty acids in quadriceps muscle by mass spectrometry,  $n = 5$ . **(f)** RT-qPCR analysis of inflammatory genes in quadriceps,  $n = 5$ . **(g)** Western blot analysis of molecular insulin signaling in muscles harvested immediately after the insulin clamp assay. Data were presented as the mean  $\pm$  S.E.M. \*  $P < 0.05$  between genotypes by t-test.

## Supplementary Figure 2

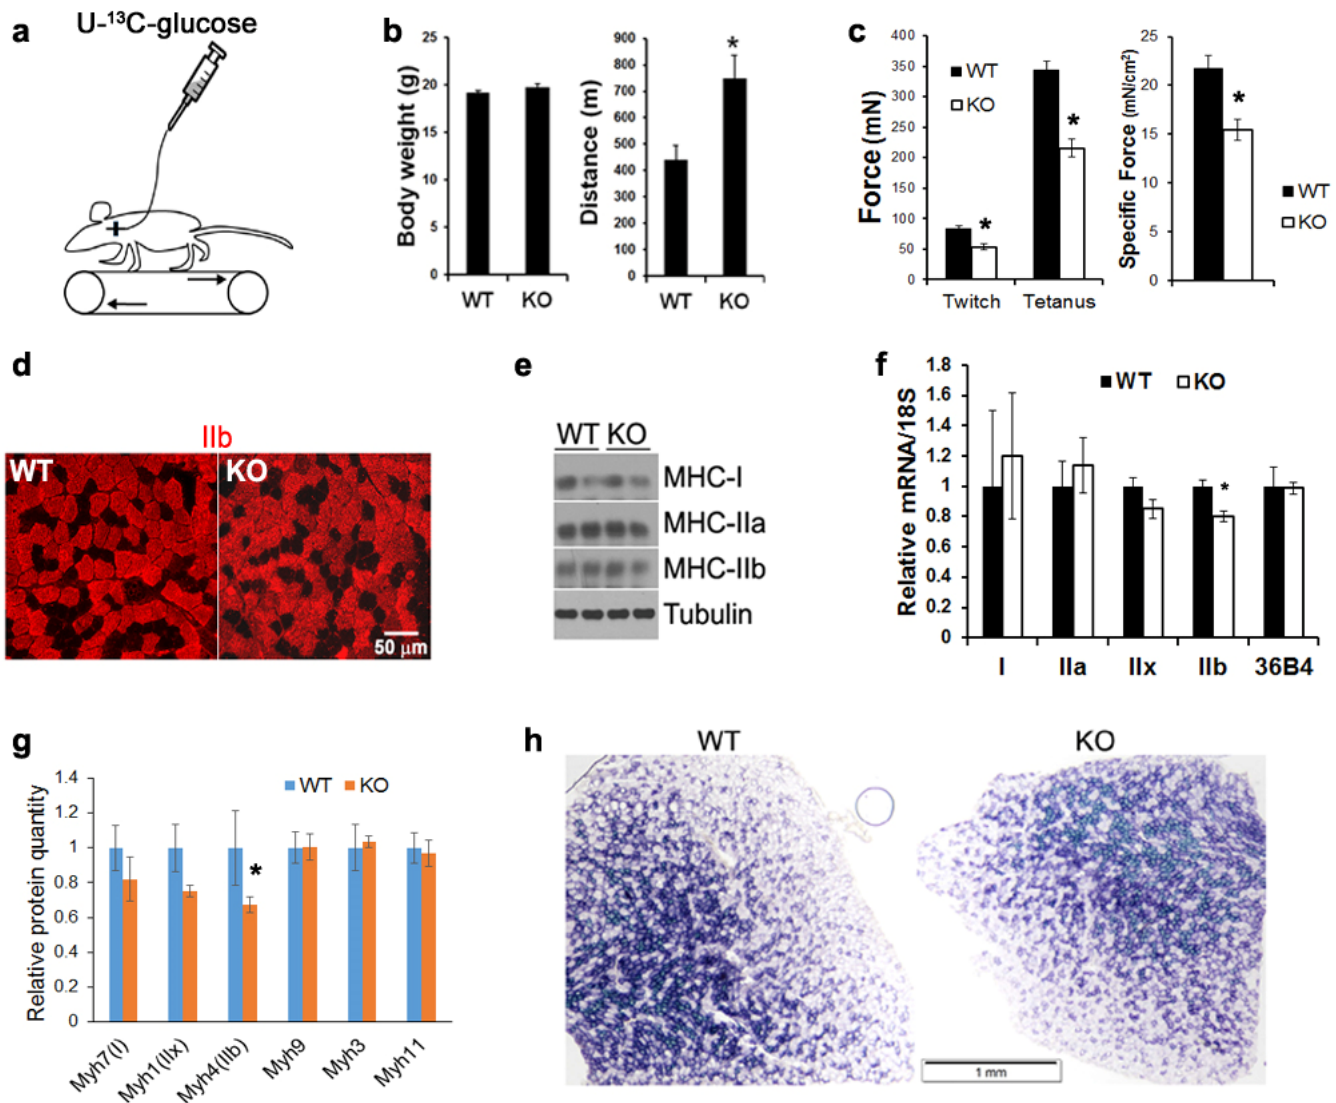

**Supplementary Figure 2.** (a) Diagram showing the set-up of the experiment. Mice were infused with <sup>13</sup>C-glucose through jugular vein while running on treadmill. (b) Body weight and distance run on treadmill at the time of exhaustion (50 electric shocks received) for female mice at 8-weeks old,  $n = 10$ . (c) Muscle force measurement during *ex vivo* contraction studies with extensor digitorum longus (EDL) muscles,  $n = 8$ . (d) Immunofluorescence staining of cross sections of TA muscles with antibodies for MHC IIb. (e) Western blot analysis with myosin heavy chain (MHC) isoform-specific antibodies in gastrocnemius muscles. (f) RT-qPCR analysis of the indicated MHC isoforms in gastrocnemius at 8-months old,  $n = 5$ . (g) Nano-LC-MS-based TMT proteomic analysis of myosin isoforms in gastrocnemius 6 months old,  $n = 3$ . (h) Succinate dehydrogenase (SDH) staining of TA muscles. Data were presented as the mean  $\pm$  S.E.M. \*  $P < 0.05$  between genotypes by t-test.

### Supplementary Figure 3

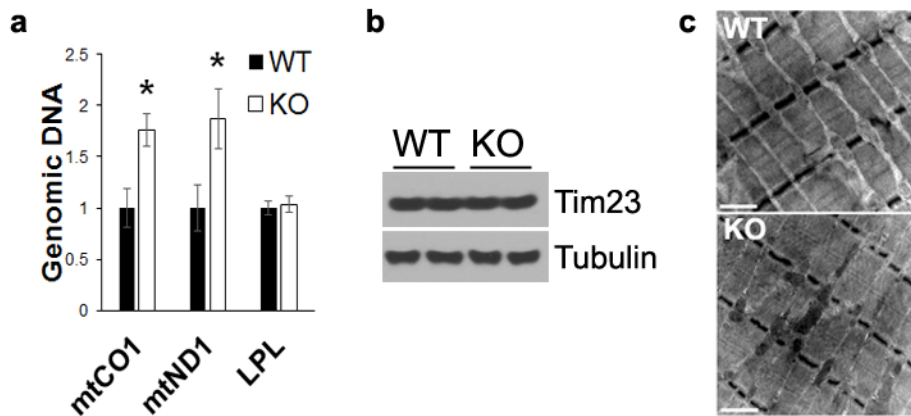

**Supplementary Figure 3.** (a) Mitochondrial DNA quantification by qPCR in whole genome extraction of EDL muscles. Mitochondrial genes (mtCO1 and mtND1) were normalized to a nuclear gene Ndufv1. Another nuclear gene Lpl serves as an independent control,  $n = 5$ . (b) Western blot analysis of quadriceps with antibodies for mitochondrial marker protein Tim23. Tim23, translocase of the inner membrane 23. (c) Electron microscopy of EDL muscle (scale bar: 1  $\mu$ m). Data were presented as the mean  $\pm$  S.E.M. \*  $P < 0.05$  between genotypes by t-test.

## Supplementary Figure 4

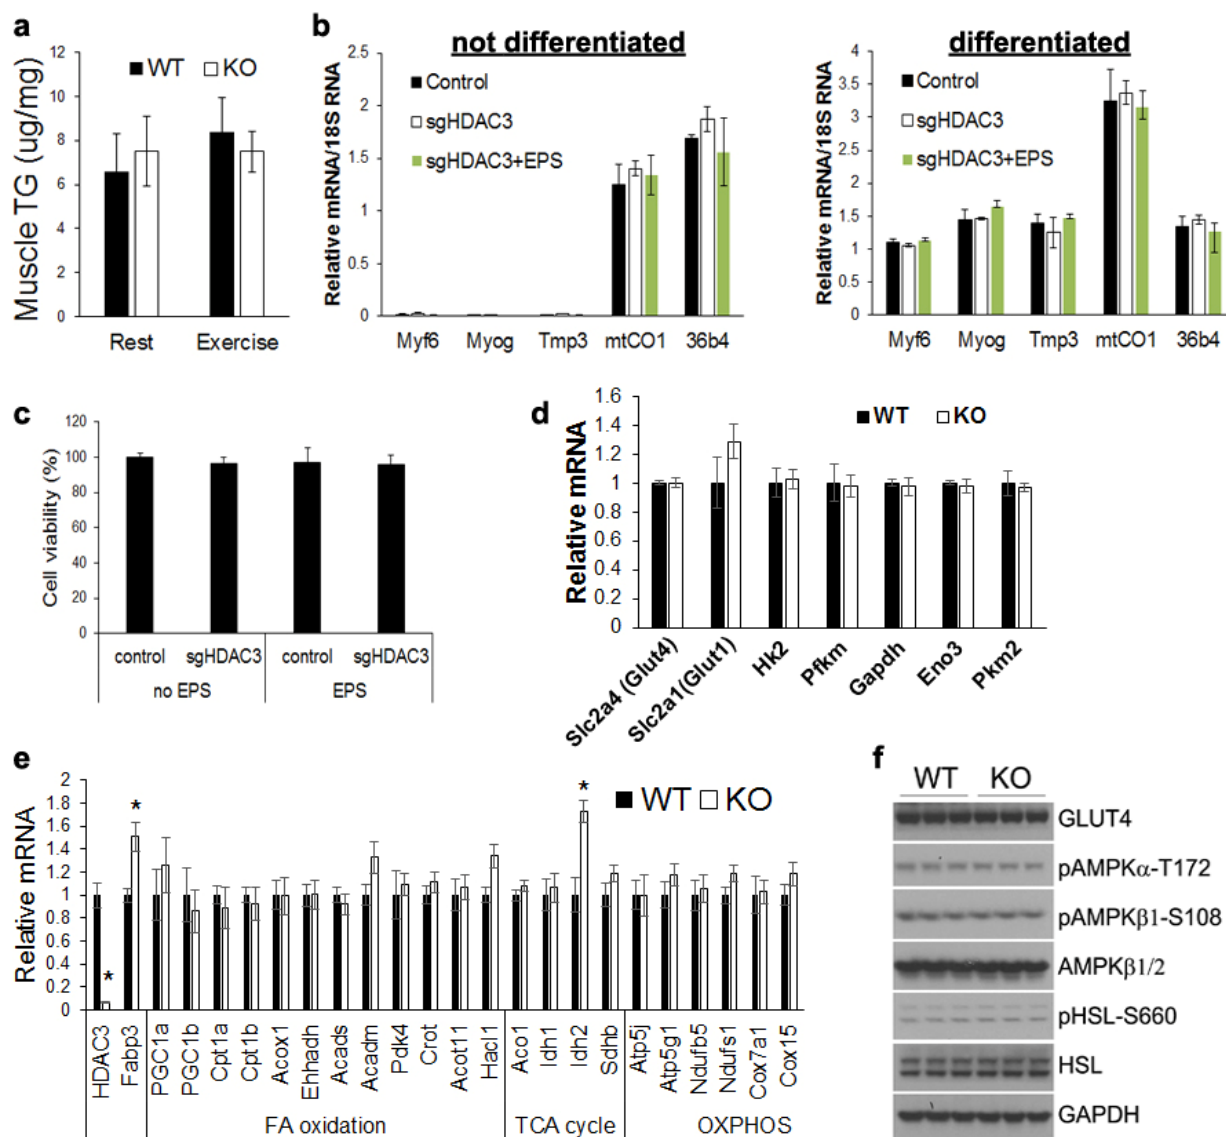

**Supplementary Figure 4.** (a) Muscle triglycerides (TG) measurement,  $n = 5$ . (b) RT-qPCR analysis of differentiation marker genes in C2C12 myotubes treated with adenovirus and/or electric pulse stimulation (EPS). 36b4 serves as a 2<sup>nd</sup> housekeeping gene control in addition to 18s RNA.  $n = 5$ . (c) MTT cell viability assay of C2C12 myotubes treated with adenovirus and/or electric pulse stimulation (EPS),  $n = 5$ . (d) RT-qPCR analysis of genes involved in glucose transport and metabolism in tibialis anterior (TA) muscles,  $n = 5$ . (e) RT-qPCR analysis of major fatty acid oxidation genes and OXPHOS genes in quadriceps muscles,  $n = 5$ . (f) Western blot analysis of GLUT4 transporter, AMP-activated protein kinase (AMPK), and AMPK substrate hormone sensitive lipase (HSL). Data were presented as the mean  $\pm$  S.E.M. \*  $P < 0.05$  between genotypes by t-test.

## Supplementary Figure 5

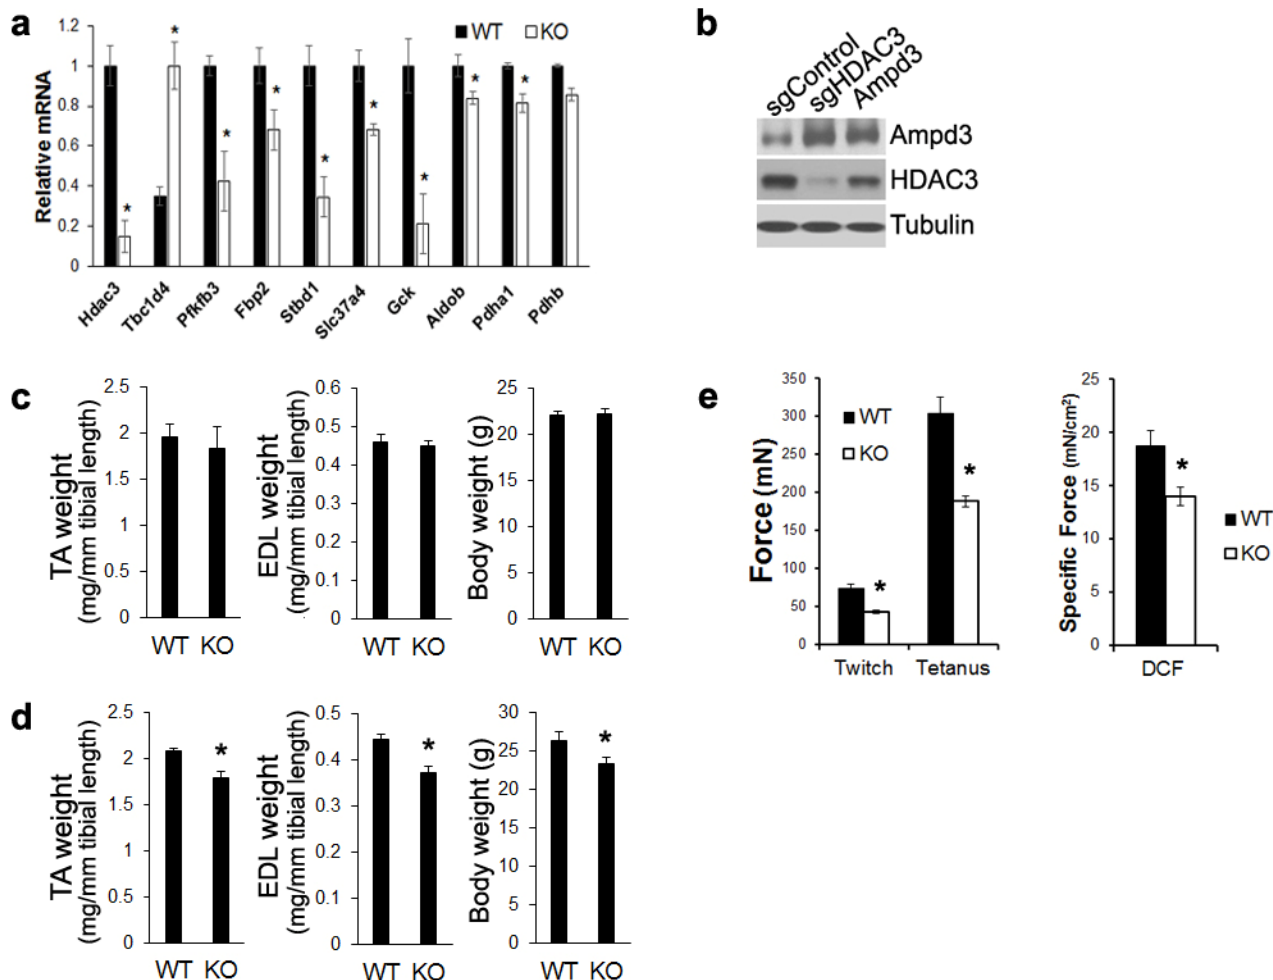

**Supplementary Figure 5.** (a) RT-qPCR analysis of genes involved in carbohydrate metabolism in tibialis anterior (TA) muscles,  $n = 5$ . (b) Western blot analysis of differentiated C2C12 myotubes treated with adenovirus for knockdown of HDAC3 or overexpression of Ampd3. (c) Muscle weight and body weight in 6-month old female mice. TA, tibialis anterior; EDL, extensor digitorum longus (EDL);  $n = 8$ . (d) Muscle weight and body weight in 10-month old female mice,  $n = 8$ . (e) Muscle force measurement during *ex vivo* contraction studies with extensor digitorum longus (EDL) muscles in the presence of deoxycoformycin (DCF),  $n = 8$ . This experiment was performed using the same cohort of mice as shown in supplementary figure 2C. Data were presented as the mean  $\pm$  S.E.M. \*  $P < 0.05$  between genotypes by t-test.

## Supplementary Figure 6

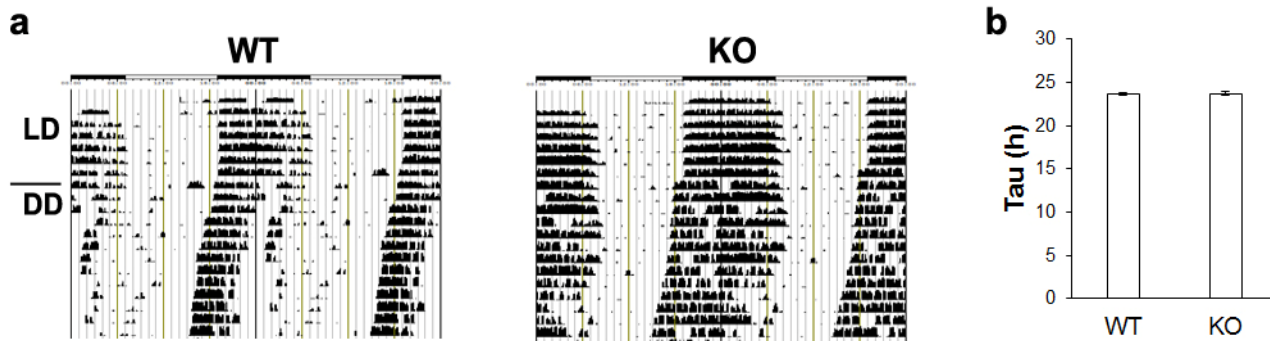

**Supplementary Figure 6. (a)** Actogram of free wheel-running activity of mice housed in normal 12-light/12-dark conditions (LD) and constant darkness (DD). **(b)** Internal period (Tau),  $n = 10$ . Data were presented as the mean  $\pm$  S.E.M.

**Supplementary Figure 7. Raw gel images for western blot.**

**Fig 1a**

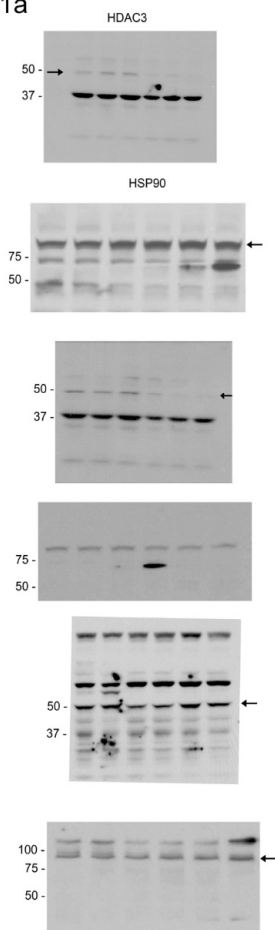

**Fig 2k**

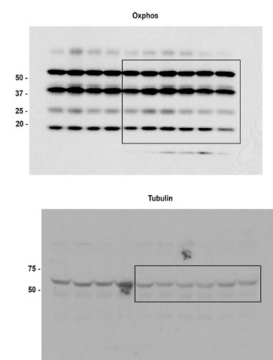

**Fig 2l**

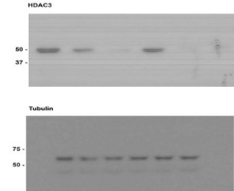

**Fig 1j**

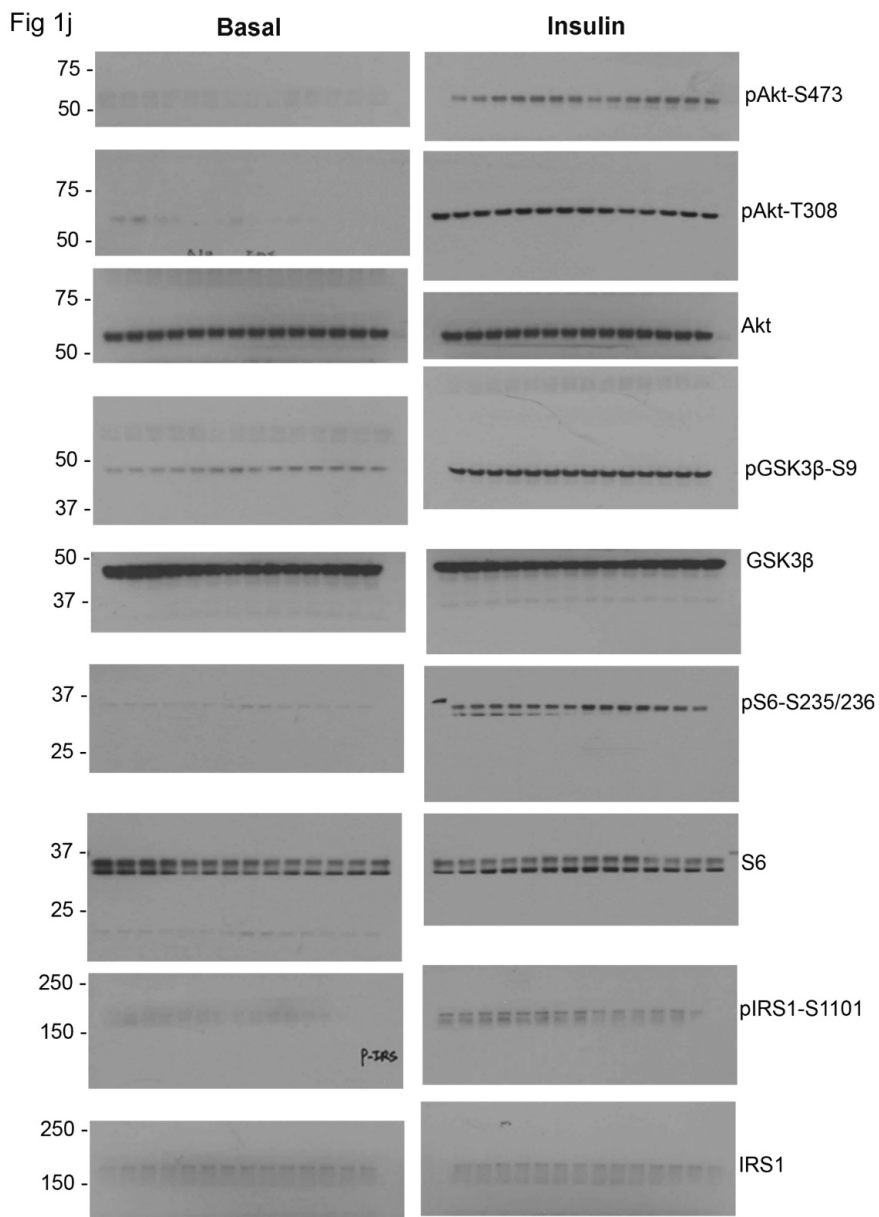

**Fig 6d**

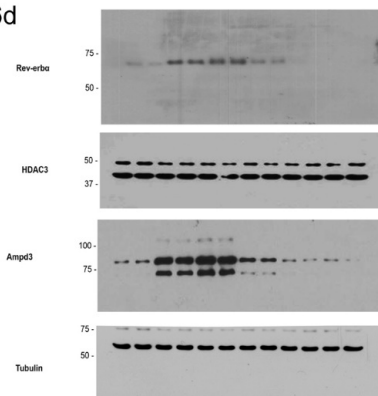

**Fig 6h**

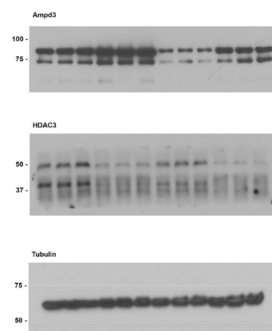

## **SUPPLEMENTAL TABLES**

The following supplemental tables were provided as Supplementary Datasets in one single .xls file.

**Supplementary Table 1.** Raw data of metabolomics study with  $^{13}\text{C}$ -glucose tracing.

**Supplementary Table 2.** A list of differentially-expressed genes from RNA-seq analysis.

**Supplementary Table 3.** A list of differentially-expressed proteins from proteomics analysis.
